## RESEARCH ARTICLE

# Using intervarietal substitution lines for the identification of wheat chromosomes involved in early responses to water-deficit stress

Karolina Dudziak<sup>1,2</sup>, Piotr Bulak<sup>3</sup>, Magdalena Zapalska<sup>1</sup>, Andreas Börner<sup>4</sup>, Hubert Szczerba<sup>5</sup>, Justyna Leśniowska-Nowak<sup>1</sup>, Michał Nowak<sup>1\*</sup>

**1** Institute of Plant Genetics, Breeding and Biotechnology, University of Life Sciences in Lublin, Lublin, Poland, **2** Medical University of Lublin, Chair and Department of Biochemistry and Molecular Biology, Lublin, Poland, **3** Department of Natural Environment Biogeochemistry, Institute of Agrophysics, Polish Academy of Sciences, Lublin, Poland, **4** Leibniz Institute of Plant Genetics and Crop Plant Research (IPK), Gatersleben, Germany, **5** Department of Biotechnology, Microbiology and Human Nutrition, Faculty of Food Science and Biotechnology, University of Life Sciences in Lublin, Lublin, Poland

\* [michal.nowak@up.lublin.pl](mailto:michal.nowak@up.lublin.pl)

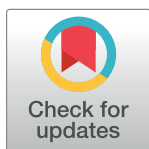

## OPEN ACCESS

**Citation:** Dudziak K, Bulak P, Zapalska M, Börner A, Szczerba H, Leśniowska-Nowak J, et al. (2019) Using intervarietal substitution lines for the identification of wheat chromosomes involved in early responses to water-deficit stress. PLoS ONE 14(8): e0221849. <https://doi.org/10.1371/journal.pone.0221849>

**Editor:** Aimin Zhang, Institute of Genetics and Developmental Biology Chinese Academy of Sciences, CHINA

**Received:** February 27, 2019

**Accepted:** August 18, 2019

**Published:** August 29, 2019

**Copyright:** © 2019 Dudziak et al. This is an open access article distributed under the terms of the [Creative Commons Attribution License](https://creativecommons.org/licenses/by/4.0/), which permits unrestricted use, distribution, and reproduction in any medium, provided the original author and source are credited.

**Data Availability Statement:** All relevant data are within the paper and its Supporting Information files.

**Funding:** The authors received no specific funding for this work.

**Competing interests:** The authors have declared that no competing interests exist.

## Abstract

Water deficit induces reactive oxygen species (ROS) overproduction, which in turn inhibits plant growth and development. High concentrations of ROS disrupt the osmotic balance in plant cells and alter membrane integrity. Chromosomes carrying structural or regulatory genes must be detected to better understand plant response mechanisms to stress. The aim of our study was to identify *Triticum aestivum* L. chromosomes involved in early responses to short-term water-deficit stress (1, 3 and 6 h). In the present study, intervarietal substitution lines of drought-tolerant 'Saratovskaya 29' and sensitive 'Janetzkis Probat' wheat cultivars were examined. We studied the biochemical plant response system and conducted an analysis of catalase, ascorbate peroxidase and guaiacol peroxidase activities, levels of lipid peroxidation and changes in relative water content. Our results determined that the first reaction was a significant increase in guaiacol peroxidase (GPX) activity. However, the strongest impact on plant responses was found for catalase (CAT), which caused a significant decrease in lipid peroxidation (LPO) levels. Our findings indicate that chromosomes 5A, 4B, 6B and 7D are associated with early responses to short-term osmotic stress in wheat.

## Introduction

Cereals are the primary food source for the growing world population, especially in developing countries [1]. Common wheat (*Triticum aestivum* L.) is widely cultivated in every geographical region in the world next to rice and maize [2]. The world's wheat cultivation area covers 220 million hectares, annually providing approximately 680 million tons of wheat grain [3,4]. From 1980 to 2008, changing climates contributed to global maize and wheat losses of 3.8%

**Abbreviations:** ABA, Abscisic Acid; APX, Ascorbate Peroxidase; BSA, Bovine Serum Albumin; CAT, Catalase; EDTA, Ethylenediaminetetraacetic Acid; FAO, Food and Agriculture Organization; GPX, Guaiacol Peroxidase; ISCSLs, Inter-varietal Single Chromosome Substitution Lines; LPO, Lipid Peroxidation; MDA, Malondialdehyde; PEG, Polyethylene glycol; PVP, Polyvinylpyrrolidone; QTL, Quantitative Trait Locus; ROS, Reactive Oxygen Species; RWC, Relative Water Content; TBARS, Thiobarbituric Acid Reactive Substances.

and 5.5%, respectively [5]. Drought stress is one of the main limiting factors causing disorders in plant growth and development [6,7]. An increase in mean temperatures and reduced rainfall are the most important agricultural issues affecting many areas of the globe. As a result, physiological, metabolic and morphological plant characteristics change, leading to a decline in crop quality and quantity [8]. The duration and intensity of drought events have a significant impact on reductions of wheat yields, which vary from 10 to 90% of potential levels reached under optimum conditions. Moreover, additional biotic and abiotic stress factors are generally present [9].

Drought leads to oxidative stress in plant cells and induces ROS formation. The peroxidation of cell membranes is the first symptom of oxidative damage caused by stress [10]. Water shortages also affect physiological traits, resulting in relative water content (RWC) changes [11,12,13]. However, plants have developed defense systems to protect cells from toxic ROS. An increase in ROS levels induces biochemical responses by activating or modulating the antioxidant system through several enzymes. The generated  $H_2O_2$  is detoxified by peroxidases (APX and GPX) and catalases (CAT). CAT eliminates  $H_2O_2$  by converting it into water and molecular oxygen; APX is the first enzyme of the ascorbate-glutathione cycle responsible for  $H_2O_2$  detoxification whereas GPX decomposes  $H_2O_2$  by oxidizing antioxidants [11,14,15]. Many studies were devoted to describing the characteristics of the antioxidant systems activity under drought treatment in various plant species [13,16,17,18,19]. Studies carried out on plants species of high economic importance such as cereals have frequently been published [10,20]. The alteration of the activities of APX, GPX, and CAT have been observed for *Triticum aestivum* under different environmental conditions (e.g., under cold temperatures [21], in the presence of zinc ions [22] and under drought conditions [13,23]). Many works report chromosomes associated with drought responses [24,25,26,27]. Most previous studies have been based on QTL analyses [28,29,30]. It has been shown that an increase in ABA concentrations can spur a more intense drought response and genes involved in ABA accumulation was identified on chromosome 5A [31]. Genes encoding dehydrins have been found on chromosome 6D in *Aegilops tauschii* [32] and on chromosomes 4A, 5A and 6A in *Triticum monococcum* [33]. Genes associated with drought responses was identified on chromosome 2A of the wheat genome [34]. Moreover, the chromosomes of A and D genomes are the most heavily involved in drought resistance [27]. No significant QTLs have been mapped on chromosomes 2B, 3A, 4A, 4B, 7A and 7B. However, there is still only limited data on how chromosomal regions of the wheat control early responses to short-term water-deficit stress.

The aim of our study was to examine biochemical changes, including antioxidant enzyme activities, relative water content (RWC) levels and membrane damage reflected by lipid peroxidation under water-deficit conditions. Moreover, from intervarietal single chromosome substitution lines (ISCSLs), we identified chromosomes associated with early responses to short-term osmotic stress in wheat.

## Materials and methods

### Plant material and water-deficit stress induction

Intervarietal single chromosome substitution lines (ISCSLs) of wheat (*Triticum aestivum* L.) were examined in this study (S1 Table). 'Saratovskaya 29' (S29), a drought-tolerant cultivar, was used as a recipient, and 'Janetzki Probat' (JP), a drought-sensitive cultivar, was used as a donor. A set of ISCSL grains was provided by the Leibniz Institute of Plant Genetics and Crop Plant Research (IPK, Gatersleben, Germany).

Grains were disinfected for 4 hours in chlorine gas. To induce germination, grains were incubated for 48 hours at 4°C and then placed on Petri dishes containing filter paper soaked

with distilled water for 2 days in the dark at 24°C. Germinating seedlings were transferred to plastic pots containing MS medium. Plants were then grown in hydroponic culture in a growth chamber for 5 days under control conditions (light/dark regime of 16/8 h at 25±3°C, relative humidity of 50±10%, and light intensity during the daytime of 350  $\mu\text{mol m}^{-2} \text{s}^{-1}$ ). Five-day-old seedlings were subjected to osmotic stress by applying 10% of PEG-6000 to MS solution. Wheat seedlings were sampled after 1, 3 and 6 hours of stress treatment and then immediately frozen and stored at -80°C for further analysis. Plants grown in MS medium without PEG were used as a control.

### Homogenate preparation

Homogenates were prepared using the method developed by Balakhnina et al. [35]. Wheat seedling leaves (0.2 g) were homogenized using liquid nitrogen in ice-cold 50 mM sodium phosphate buffer (pH 7.8) containing 5 mM EDTA and 1% (w/v) soluble polyvinylpyrrolidone (PVP). The homogenates were filtered through a nylon cloth. Part of the filtrate was used for a lipid peroxidation analysis and the rest was centrifuged at 11,000 g for 20 min at 4°C (Thermo Fisher Sorvall ST-16). The supernatants were used for the enzymatic assay. The protein content of the samples was estimated using bovine serum albumin (BSA) as a standard [36].

### Lipid peroxidation

Measurements of thiobarbituric acid reactive substance (TBARS) content were collected using Uchiyama and Mihara's method [37]. The homogenate (0.3  $\text{cm}^3$ ) was added to a mixture containing 3  $\text{cm}^3$  of 1% phosphoric acid, 1  $\text{cm}^3$  of 0.6% aqueous solution of thiobarbituric acid and 0.1  $\text{cm}^3$  of aqueous  $\text{FeSO}_4 \times 7 \text{H}_2\text{O}$  (2.8  $\text{mg cm}^{-3}$ ). The samples were incubated at 100°C for 1 h and then quickly cooled on ice. Then, 4  $\text{cm}^3$  of butanol-1 was added to each sample. After centrifugation at 3,000 g for 10 min, TBARS absorbance was measured at 532 and 600 nm (Shimadzu UV-VIS 160A, Kyoto, Japan). TBARS concentrations were calculated using a coefficient of extinction of  $156 \times \text{mM}^{-1} \text{cm}^{-1}$  and were expressed as  $\mu\text{mol/g}$  fresh weight (FW).

### Determination of antioxidant enzyme activity

CAT activity was measured by estimating  $\text{H}_2\text{O}_2$  degradation, which was identified as a decrease in absorbance at 240 nm (extinction coefficient of  $39.4 \text{mM}^{-1} \text{cm}^{-1}$ ) [38]. The reaction mixture contained 0.036%  $\text{H}_2\text{O}_2$  solution in sodium phosphate buffer (pH 7.8) and 50  $\text{mm}^3$  of plant extract in a final volume of 3  $\text{cm}^3$ . Enzyme activity was expressed as  $\mu\text{mol H}_2\text{O}_2 \text{mg protein}^{-1} \text{min}^{-1}$ .

Measurements of APX (EC 1.11.1.11) activity were performed following Nakano and Asada's method [39]. The reaction mixture (3  $\text{cm}^3$ ) consisted of 50 mM phosphate buffer (pH 7.5), 0.5 mM ascorbate, 0.1 mM EDTA and 0.1  $\text{cm}^3$  of enzyme extract. The reaction was initiated by adding 0.1  $\text{cm}^3$  of 0.1 mM  $\text{H}_2\text{O}_2$ . The decrease in absorbance as a result of ascorbate oxidation was measured at 290 nm (extinction coefficient of  $2.8 \text{mM cm}^{-1}$ ). APX activity was expressed as  $\mu\text{mol ascorbate oxidized mg protein}^{-1} \text{min}^{-1}$ .

GPX activity (EC 1.11.1.9) was assayed based on the modified method described by Balakhnina et al. [35]. The reaction mixture (3  $\text{cm}^3$ ) contained 50 mM phosphate buffer (pH 7.5), 0.1  $\text{cm}^3$  of 0.15%  $\text{H}_2\text{O}_2$  and 0.1  $\text{cm}^3$  of plant extract. The reaction was initiated by adding 0.1  $\text{cm}^3$  of 56 mM guaiacol. The increase in absorbance as a result of guaiacol conversion into its oxidized form (tetraguaiacol) was measured at 470 nm. GPX activity was determined using the extinction coefficient for tetraguaiacol ( $26.6 \text{mM}^{-1} \text{cm}^{-1}$ ).

## Relative water content (RWC)

Relative water content (RWC) was measured in control and stressed seedlings as described earlier [11,40,41]. Fully expanded leaves were immediately cut and weighed as fresh weight (FW). The seedlings were then soaked for 4 h in distilled water in the dark, and the turgid weight was measured. The samples were subsequently dried for 24 h at 80°C in a hot-air oven and the total dry weight (DW) was recorded. RWC was calculated according to the following formula:  $RWC (\%) = ((FW-DW)/(TW-DW)) * 100$  [42].

## Statistical analysis

The experiments were repeated in two full independent biological replications and each data point was measured as the mean of three technical replications (n = 6). A one-way analysis of variance (ANOVA) and Tukey's posttest were used to compare the means of controls and stress-treated plants across the same substitution lines. Dunnett's test was applied to estimate significant differences between the tested lines and S29; differences measured at  $p < 0.05$  were considered significant. Correlations of biochemical changes were estimated using Pearson's correlation coefficient. In order to determine the main sources of variability, principal component analysis (PCA) method was applied. All data were analyzed using Statistica 13.1 (Dell Software).

## Results

### Lipid peroxidation

Water stress induced lipid peroxidation was observed in most of the tested lines and was expressed by higher levels of TBARS content (Fig 1). Only S29 and lines of homoeologous group 4 (4A, 4B) and line 2D did not show any significant changes in lipid peroxidation levels over 6 h of stress. However, the main trend observed for most of the remaining lines (lines containing chromosomes belonging to homoeologous groups 3, 6 and 7) involved an immediate response and an increase in LPO levels within the first hours of PEG treatment. TBARS levels subsequently decreased. Drought-sensitive cultivar JP and lines with the substituted homoeologous group 1 chromosomes showed an increase in LPO after 1 h, which then remained at stable levels. The strongest changes in LPO levels, which continuously increased over 6 h of the experiment, were observed for line 4D. The most stable level of lipid peroxidation was observed for lines with substituted A genome chromosomes. Significant differences between the drought-tolerant (S29) and drought-sensitive (JP) cultivars were observed only after 1 h of stress. The substitution of chromosomes 6B and 7D had a stronger impact on LPO levels than the recipient (S1, S2 and S3 Figs).

### Antioxidant enzyme activity

The same characteristic patterns of CAT activity were observed in the majority of lines (Fig 2). The initial level of catalase decreased significantly over the first hours of stress and then increased after 6 h. This trend was recorded for all lines (except for 1A, 1D, 2A, and 3A) and for drought-tolerant cultivar S29. The remaining lines did not show significant changes after 1 h of stress, but CAT activity levels increased after 3 h (1D and 2A) and 6 h (for 1A, 1D, 2A, and 3A) of stress. No changes were observed for JP over 6 h of osmotic stress. Lines 1A, 4A, 5A, 4B and 7D showed the strongest differences in CAT activity relative to the recipient (S29) (S4, S5, S6 and S7 Figs). Significant differences between the drought-tolerant and sensitive cultivars were observed after 1 and 6 h of water deficit and under optimum conditions.

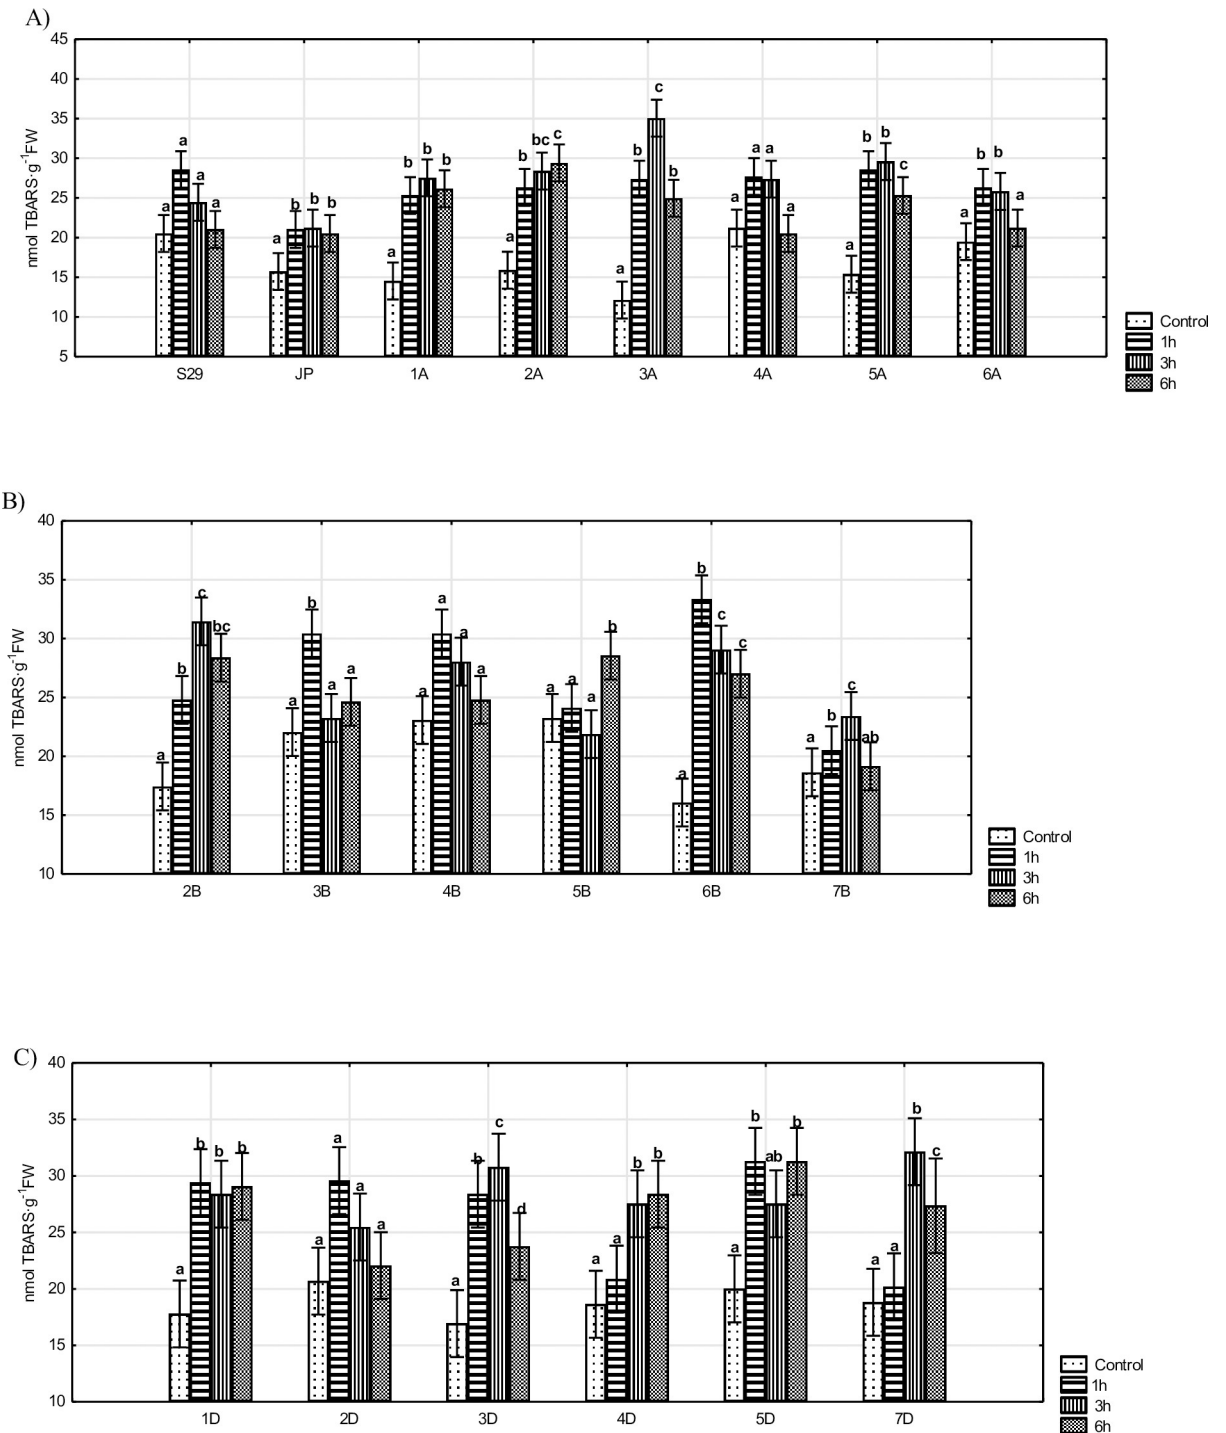

**Fig 1. Levels of lipid peroxidation expressed in terms of TBARS concentration in S29(JP) substitution lines during 1, 3 and 6 h of 10% PEG treatment and in non-exposed plants.** A) S29; JP; lines with substitution of A genome chromosomes; B) lines with substitution of B genome chromosomes; C) lines with substitution of D genome chromosomes. Bars represent confidence interval (CI). Letters (a, b, c) indicate significant differences at  $p < 0.05$  according to Tukey's multiple range test, means with the same letter are not significantly different.

<https://doi.org/10.1371/journal.pone.0221849.g001>

The results of the APX activity analysis indicate that significant changes were only observed for lines with substituted A genome chromosomes (except for 3A and 5A), 2D and S29 (Fig 3).

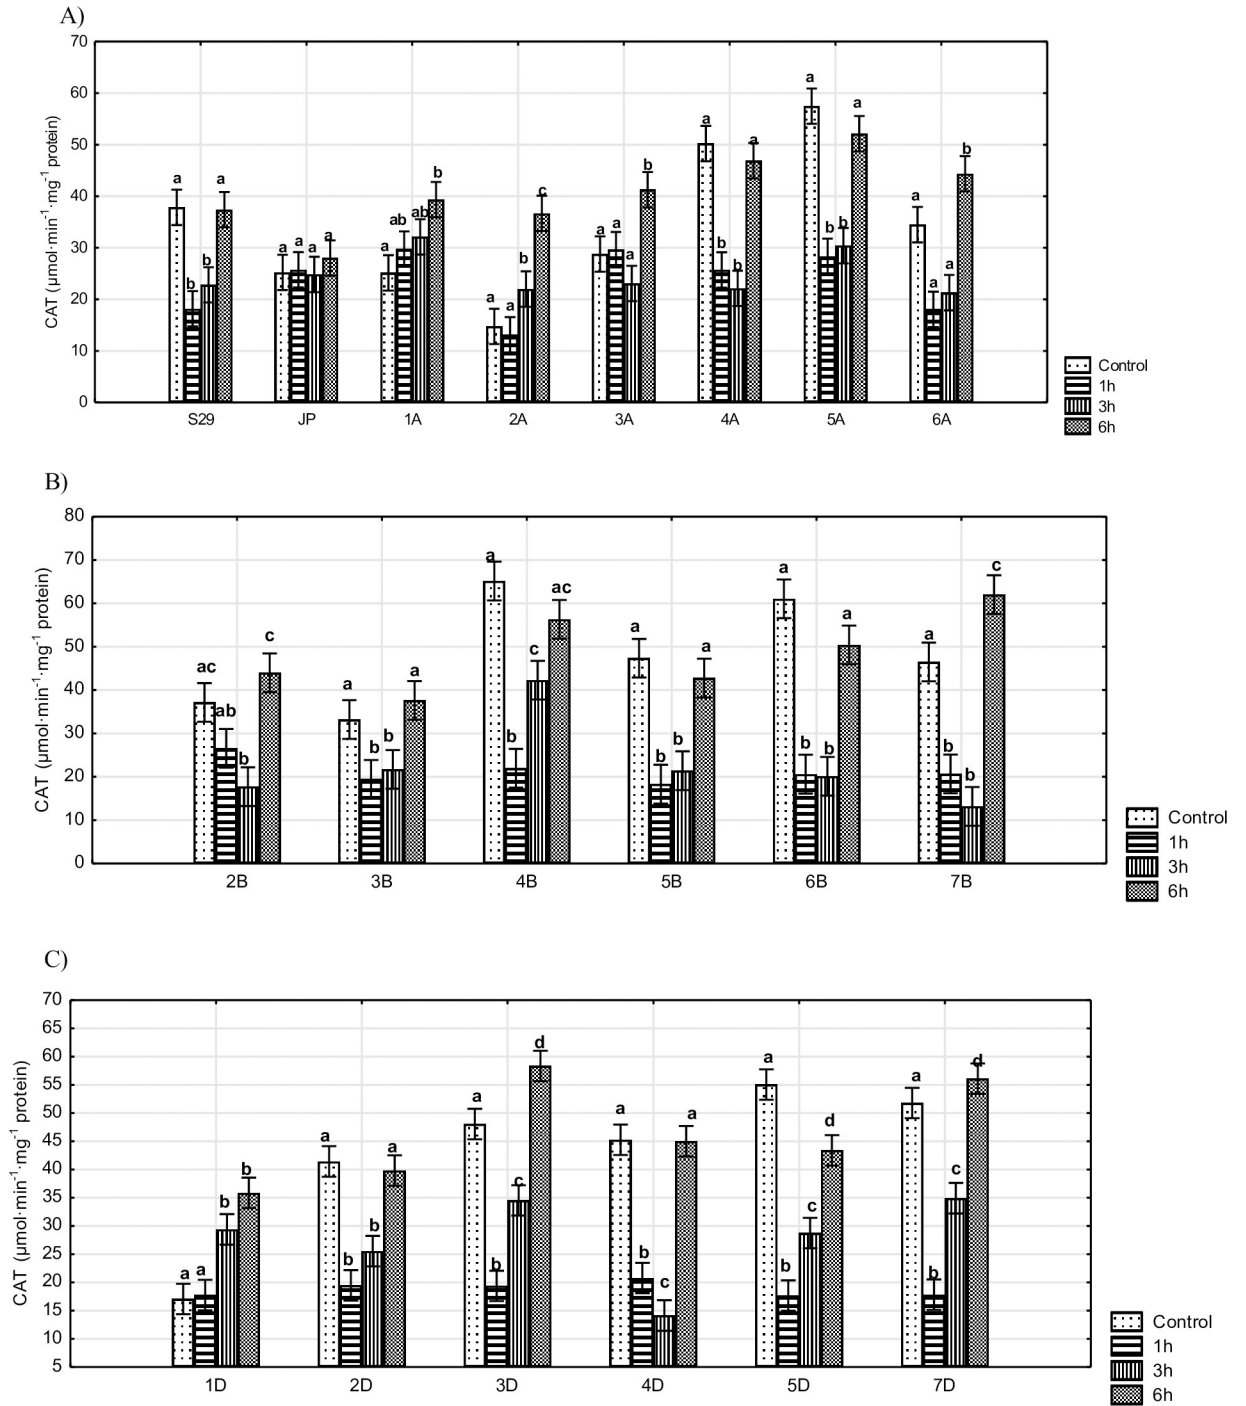

**Fig 2. The activity of CAT in S29(JP) substitution lines during 1, 3 and 6 h of 10% PEG treatment and in non-exposed plants.** A) S29; JP; lines with substitution of A genome chromosomes; B) lines with substitution of B genome chromosomes; C) lines with substitution of D genome chromosomes. Bars represent confidence interval (CI). Letters (a, b, c) indicate significant differences at  $p < 0.05$  according to Tukey's multiple range test, means with the same letter are not significantly different.

<https://doi.org/10.1371/journal.pone.0221849.g002>

However, an increase in APX activity levels was observed after only 6 h of stress. Other lines did not show any changes in the activity of this enzyme. Furthermore, all tested lines and JP

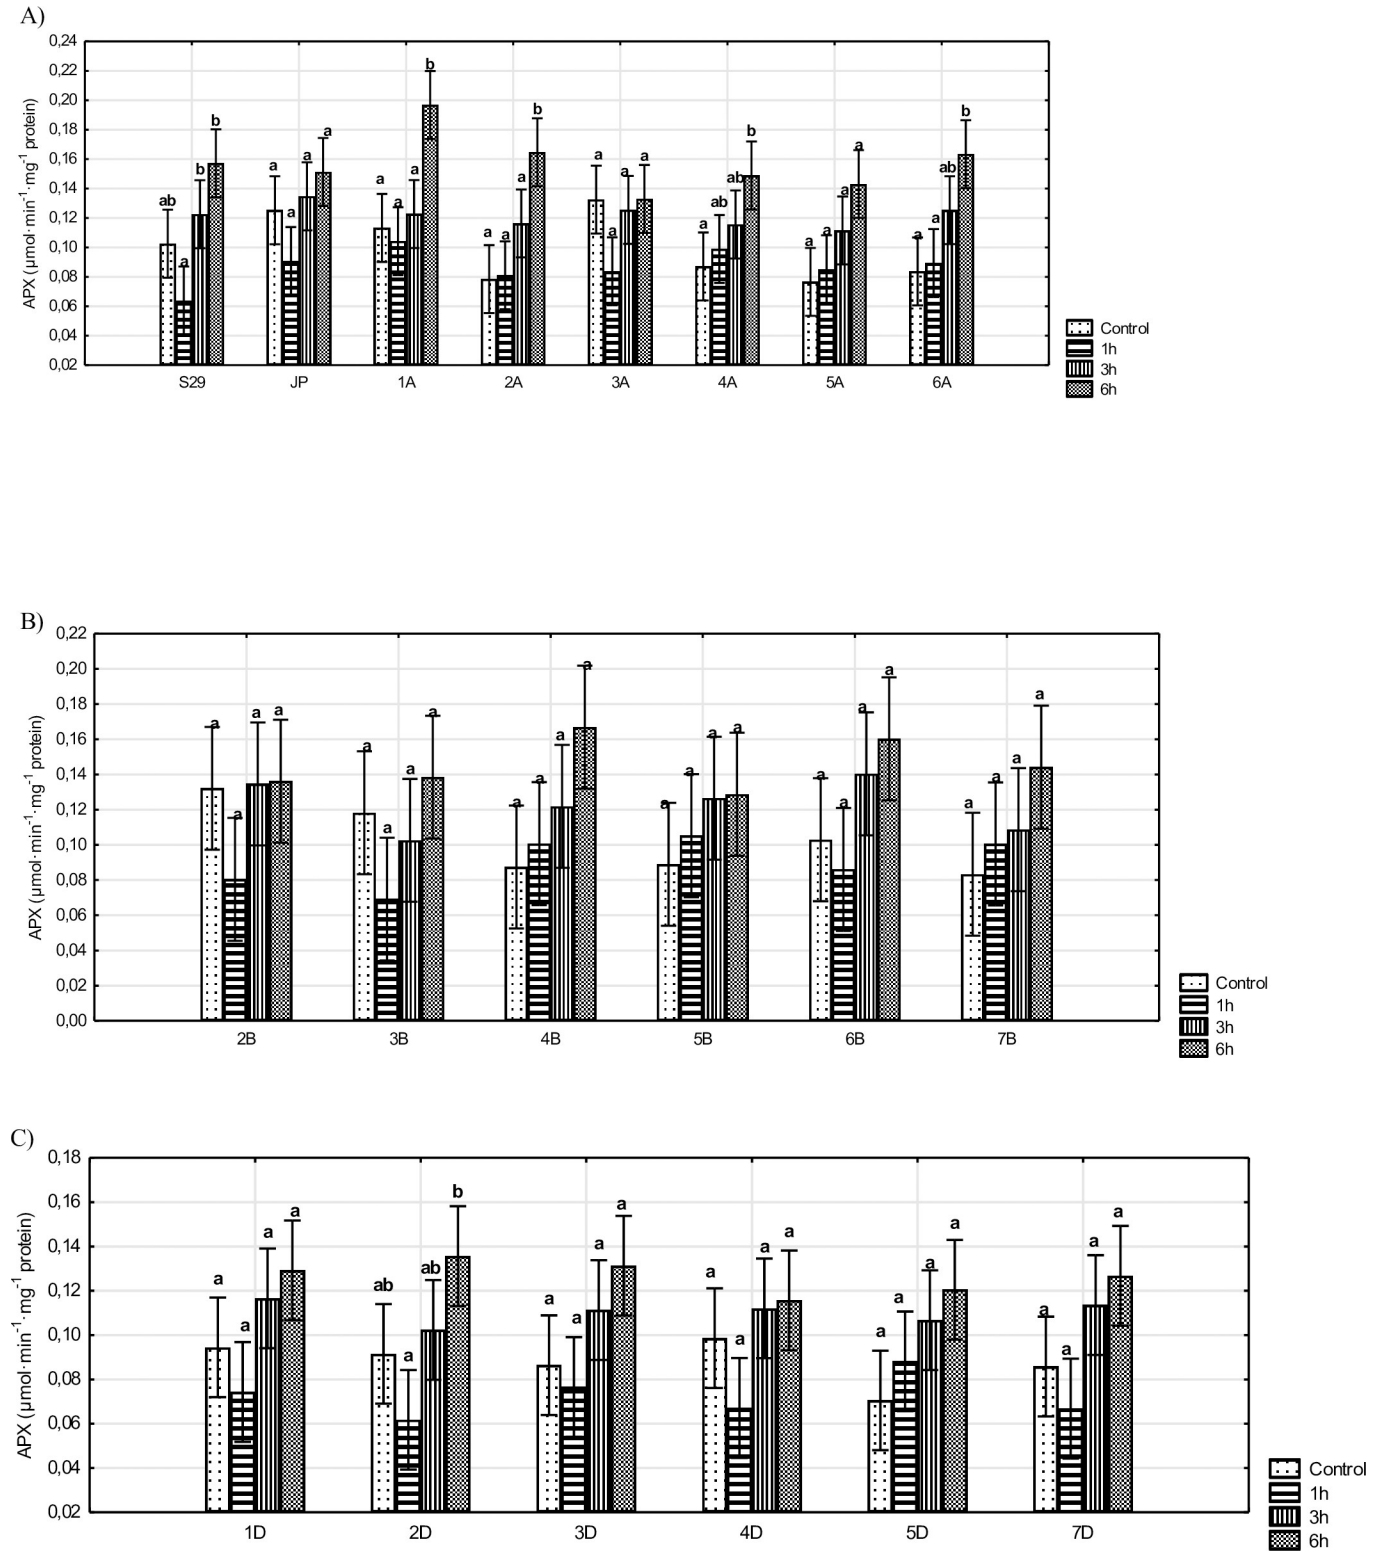

**Fig 3. The activity of APX in S29(JP) substitution lines during 1, 3 and 6 h of 10% PEG treatment and in non-exposed plants. A) S29; JP; lines with substitution of A genome chromosomes; B) lines with substitution of B genome chromosomes; C) lines with substitution of D genome chromosomes. Bars represent confidence interval (CI). Letters (a, b, c) indicate significant differences at  $p < 0.05$  according to Tukey's multiple range test, means with the same letter are not significantly different.**

<https://doi.org/10.1371/journal.pone.0221849.g003>

did not show any significant differences relative to the recipient (S29) (S4, S8, S9 and S10 Figs).

The analysis of GPX activity did not reveal any characteristic trends (Fig 4). For lines with substituted B genome chromosomes (except for 5B) and for 4D and 5A lines, an increase in GPX activity was observed over the first hours of stress, which significantly diminished after 6 h. Lines with substituted D genome chromosomes showed a constant increase in activity (5D) or an initial decrease followed by an increase after 6 h (1D, 2D, 3D, and 7D). The same pattern of activity was observed in S29. A similar trend was observed for lines with substituted A genome chromosomes and JP. However, levels of activity for these forms were still lower after 6 h of stress than for the untreated plants. Significant differences were observed for many of the tested lines (5A, 6A, 2B, 4B, 5B, 6B, 7B, 4D, and 5D) at each time point of PEG treatment relative to S29. The results indicate that lines containing chromosomes of homoeologous groups 5, 6 and 7 had the strongest impacts on GPX activity. Significant differences were found between S29 and JP after 1 h of stress and under control conditions (S4, S11, S12 and S13 Figs).

Furthermore, the performed analysis shows that CAT activity is positively correlated with APX and negatively correlated with GPX and LPO (Table 1).

### Relative water content

The obtained results do not show any significant changes in RWC for the tested lines treated with 10% PEG for 6 h. Water content levels were similar across all lines and varied between 85% and 95%. All changes in RWC were not statistically significant. No differences between the donor (S29) and tested lines were detected (Fig 5).

### Principal component analysis (PCA)

The PCA analysis revealed that APX activity is the least influential in determining the PC1 while CAT activity plays the most important role (Fig 6). The first four PCs represented 92.96% of the total variance (PC1: 30.89%, PC2: 23.35%, PC3: 20.96%, PC4: 17.76%). Analysis of the loading factors between principal components showed that the activity of CAT and APX are the most influential variables in determining the PCA model (Fig 7).

### Discussion

The formation of ROS is responsible for the stress-induced peroxidation of lipids and for membrane damage. Some compounds react with thiobarbituric acid (TBA), e.g., MDA, and form products called thiobarbituric acid reactive substances (TBARS) [43]. Total quantity of TBARS reflects the level of LPO [11]. In our study, most of the tested lines showed an increase in LPO levels after 1 or/and 3 h and underwent a significant decline after 6 h of water-deficit stress what indicates that the third hour may constitute the key period of responses to water-deficit stress during the seedling stage. Moreover, lipid peroxidation of membranes was not severe at this time. Drought did not have a significant impact on plant conditions and plants were able to acclimate. The results confirm previous data on the application of short-term stress (stress measured in hours) in *Eremosparton songoricum* [44], *Setaria italica* [11], barley [10], *Pisum sativum* L. [45]. Our study demonstrates that unchanged LPO levels observed are associated with plant tolerance to osmotic stress. No changes in lipid peroxidation were observed in *Cleome gynandra* [46] or for a tolerant maize cultivar [47]. Moreover, our results reveal a higher level of LPO in S29 than in JP what can indicate that different adaptive mechanisms are involved in the regulation of its redox status. Furthermore, the drought-tolerant cultivar showed higher levels of membrane integration under osmotic stress, which are used as a



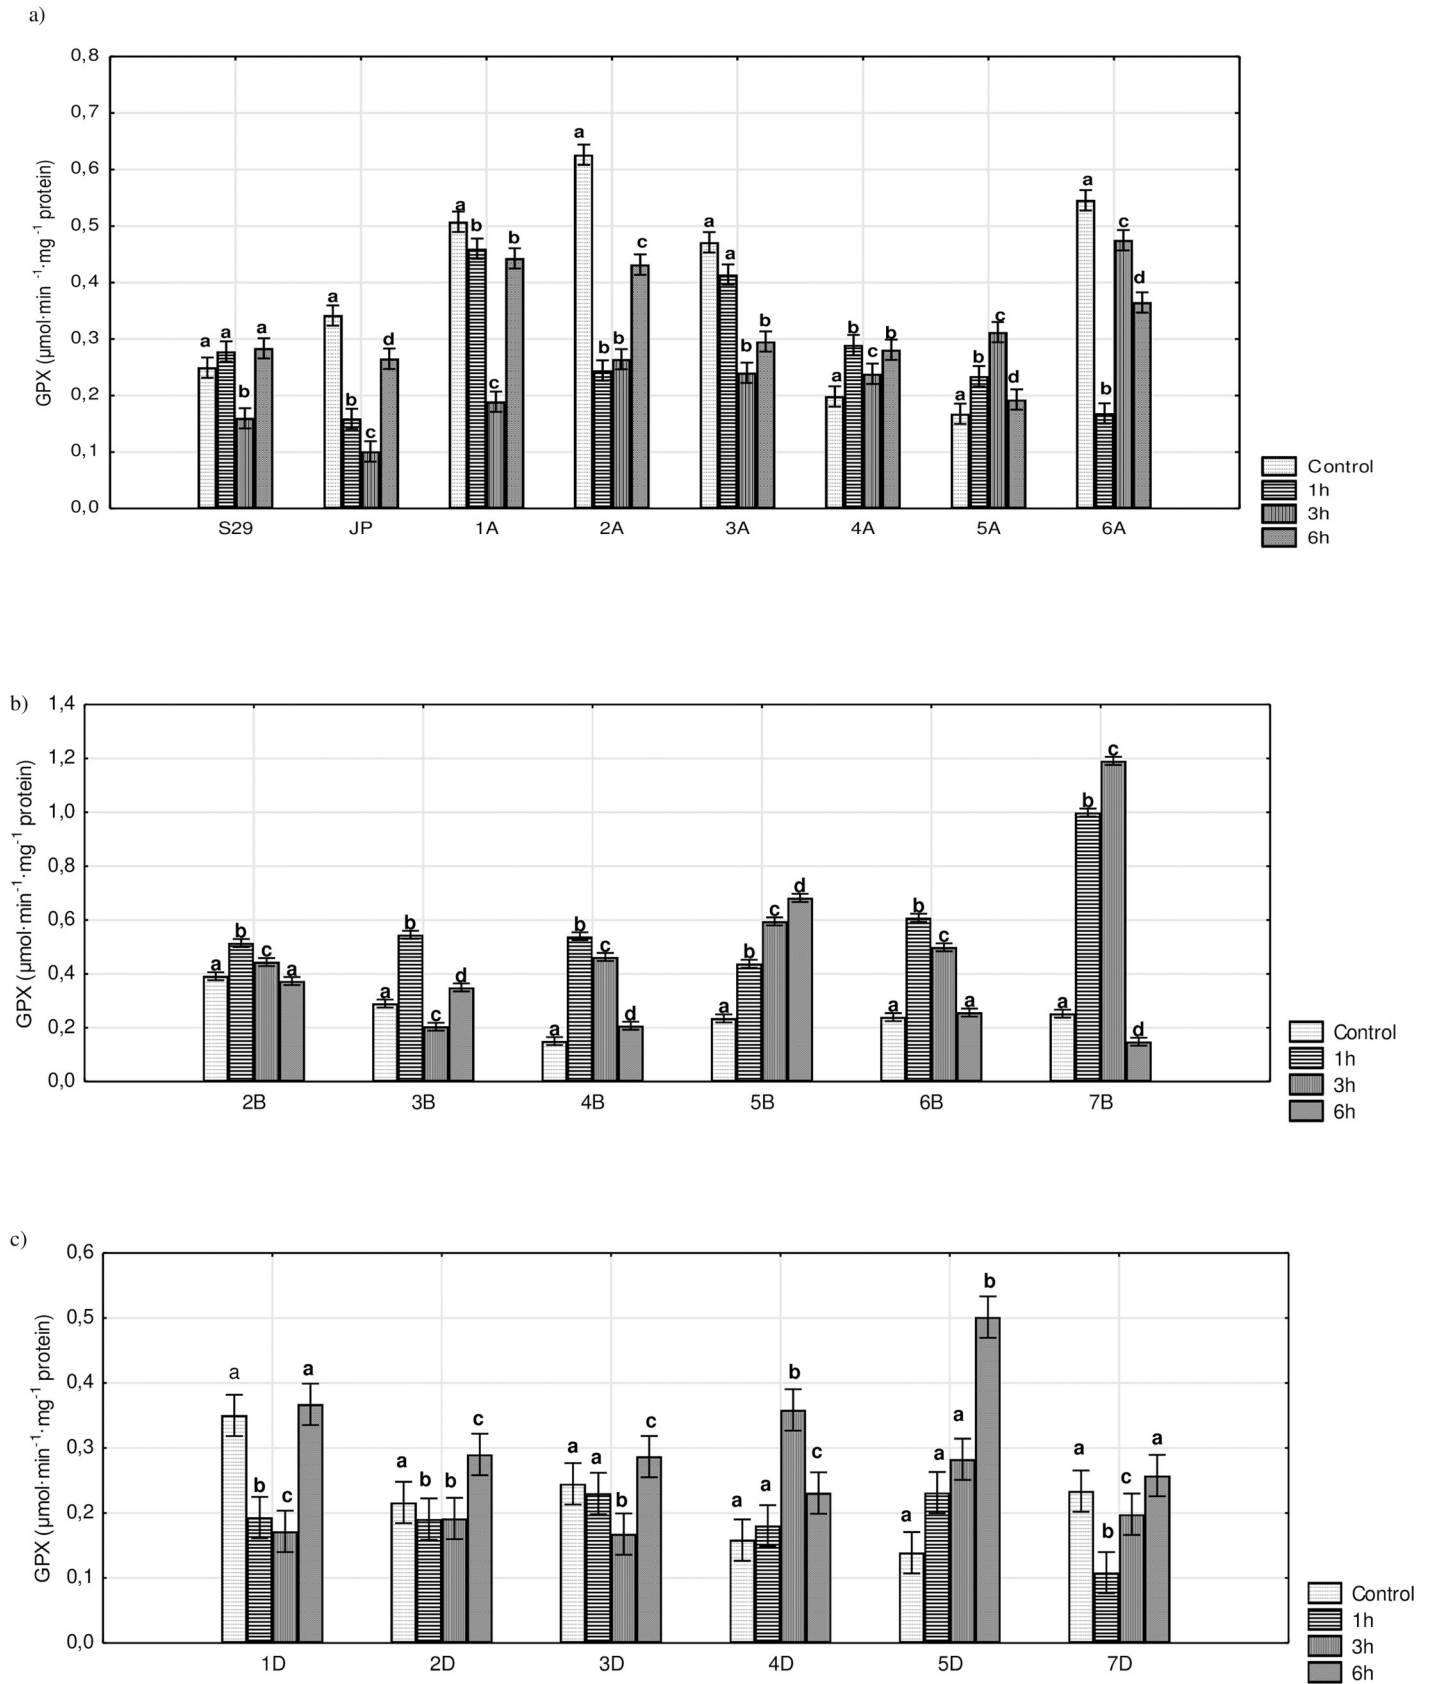

**Fig 4. The activity of GPX in S29(JP) substitution lines during 1, 3 and 6 h of 10% PEG treatment and in non-exposed plants.** A) S29; JP; lines with substitution of A genome chromosomes; B) lines with substitution of B genome chromosomes; C) lines with substitution of D genome chromosomes. Bars represent confidence interval (CI). Letters (a, b, c) indicate significant differences at  $p < 0.05$  according to Tukey's multiple range test, means with the same letter are not significantly different.

<https://doi.org/10.1371/journal.pone.0221849.g004>

direct indicator of dehydration stress tolerance. Similar observations have been reported on drought-sensitive and tolerant wheat cultivars [48] or *Setaria italica* L. [11]. Several studies have been conducted on *Triticum aestivum* responses to long-term drought [13,49]. Previous reports show a continuous rise in LPO levels occurring after 3, 6, 9 and 10 d of drought. However, these data do not describe early plant reaction occurring directly after the introduction of stress. From the presented results and previous studies, we suggest that wheat seedlings can respond to stress induction immediately by activating antioxidant enzymes, but they cannot endure prolonged periods of drought stress.

Our study demonstrates that major patterns of CAT activity undergo a significant decline after 1 and 3 h followed by an increase. Similar observations have been made for *Eremosparton songoricum* under drought conditions [44] and for maize seedlings treated with sorbitol [50]. In the present study the level of CAT activity significantly declines during the first hours of stress due to the osmotic shock caused by  $H_2O_2$  accumulation. The antioxidant system has not been yet activated. The same trend has also been observed in the 'Rum' cultivar of barley during long periods of stress [17]. In our study, a significant increase in CAT activity was observed after a longer water deficit period (6 h). Similar reaction has been described for tobacco after 10 h of 10% PEG treatment [51] and for a tolerant maize cultivar after 72 h of drought [47].

A different pattern of CAT activity was observed for substitution lines 4A, 6A, 4B and 7D after long-term periods of water shortage relative to the recipient [26]. Based on our results and previous studies, these chromosomes are associated with wheat responses expressed by changes in CAT activity occurring during short- and long-term periods of water deficit. Moreover, Osipova et al. [26] reported an increase in enzyme activity for lines 1A, 6A and 7B and no significant changes in lines 4A, 5A, 5B, 2B, 6B and 2D, which is consistent with the results of our study. Thus, we assume that prolonged osmotic stress treatment should not change the observed pattern of CAT activity for these lines.

We did not observe any changes in APX activity for most of the tested lines. Our results confirm the results of an earlier study performed on drought-sensitive wheat cultivars subjected to mild (-0.4 MPa) osmotic stress for 8 d [16]. Moreover, no induction of APX activity has been observed for *Pisum sativum* L. [45], maize [50], *Koeleria macrantha* [52], rice [53], *Phaseolus vulgaris* [54], or the 'Rum' cultivar of barley [17] in the first hours of stress. According to Hernández and Almansa [45], APXs are present in mitochondria and peroxisome membrane fractions, where they play a major function in  $H_2O_2$  scavenging. This scavenging

**Table 1. The Pearson's correlation between APX, CAT, GPX activity and LPO in S29(JP) substitution lines.**

| Trait | Correlation<br>$p < .05000$ N = 160 |            |            |            |
|-------|-------------------------------------|------------|------------|------------|
|       | APX                                 | CAT        | GPX        | LPO        |
| APX   | 1.000000                            | 0.290520*  | 0.062702   | 0.030515   |
| CAT   | 0.290520*                           | 1.000000   | -0.308663* | -0.263656* |
| GPX   | 0.062702                            | -0.308663* | 1.000000   | 0.025849   |
| LPO   | 0.030515                            | -0.263656* | 0.025849   | 1.000000   |

\* indicates significant differences compared at  $p < 0.05$

<https://doi.org/10.1371/journal.pone.0221849.t001>

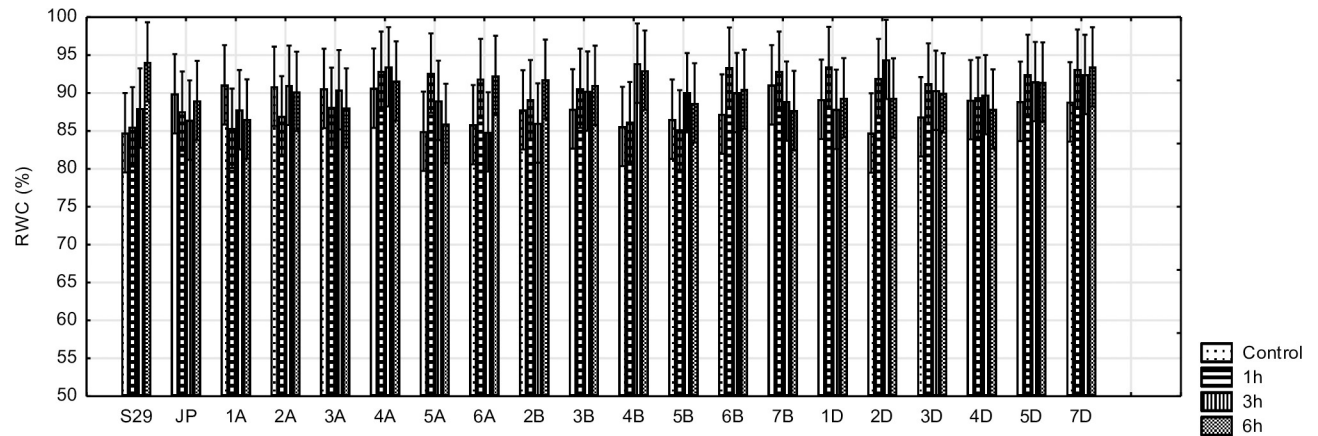

**Fig 5.** RWC in S29(JP) substitution lines during 1, 3 and 6 h of 10% PEG treatment and in non-exposed plants. Bars represent confidence interval (CI).

<https://doi.org/10.1371/journal.pone.0221849.g005>

system can prevent increases in  $H_2O_2$  levels in the cytosol during periods of optimum growing conditions and under certain plant-stress conditions as  $H_2O_2$  concentrations increase. This lack of change in enzyme activity can be attributed to a high level of activity observed in plants under control conditions. Moreover, Mittler and Zilinskas [55] found that minor changes in APX activity observed in response to drought are sufficient for scavenging elevated levels of  $H_2O_2$  forming under these stress conditions. However, based on previous reports, we believe that prolonged drought treatment should cause an increase in APX activity, which was observed in wheat after 6 d [49] and in the 'Yarmouk' barley cultivar after 9 d [17]. In our study, we observed an enhanced level of APX activity in drought-tolerant cultivar 'Saratovskaya 29.' According to Chugh et al. [47], increased APX activity levels in tolerant forms might constitute an adaptive response to a higher level of ROS. Similar observations have been reported for drought-resistant maize [47] and wheat [16]. Osipova et al. [26] observed a significant increase in APX activity for lines 1A, 2A and 4A during periods of long-term stress. Moreover, these authors did not observe any changes in APX activity for most lines substituting B and D genome chromosomes. This study indicates that prolonged periods of water deficit should not cause any changes in APX activity in these lines.

In our study, we did not find major trends of GPX activity. Variable patterns of GPX activity have also been observed in different genotypes of wheat [56] and maize [47]. From previous data, we suggest that a longer drought treatment period would spur a continuous increase in GPX activity in S29 but no changes in JP [13]. Furthermore, the drought-resistant cultivar exhibited a higher level of GPX activity compared to the sensitive one, which has also been described for wheat by Sheoran et al. [13]. The latter authors suggest that different wheat genotypes have discrete water stress thresholds and therefore use different physiologically adaptive mechanisms to regulate their redox status. In our study, a decline in GPX activity observed in the first hours of stress was recorded for most of the tested lines with the substitution of A and D genome chromosomes. Similar outcomes have been described for *Brassica* after 3 h of heat stress [57]. We found 6 h to be an insufficient amount of time to enhance GPX activity in lines substituting A genome chromosomes. The limited activity of GPX observed in these lines suggests that other enzymes play the main role in the antioxidant system (CAT and APX) during the short-term stress treatment. A significant increase in GPX activity after 1 h of stress was observed for lines with substituting B genome chromosomes and 5A and 4D lines. Rapid stress responses expressed by an immediate increase in GPX activity have also been found for *Vigna*

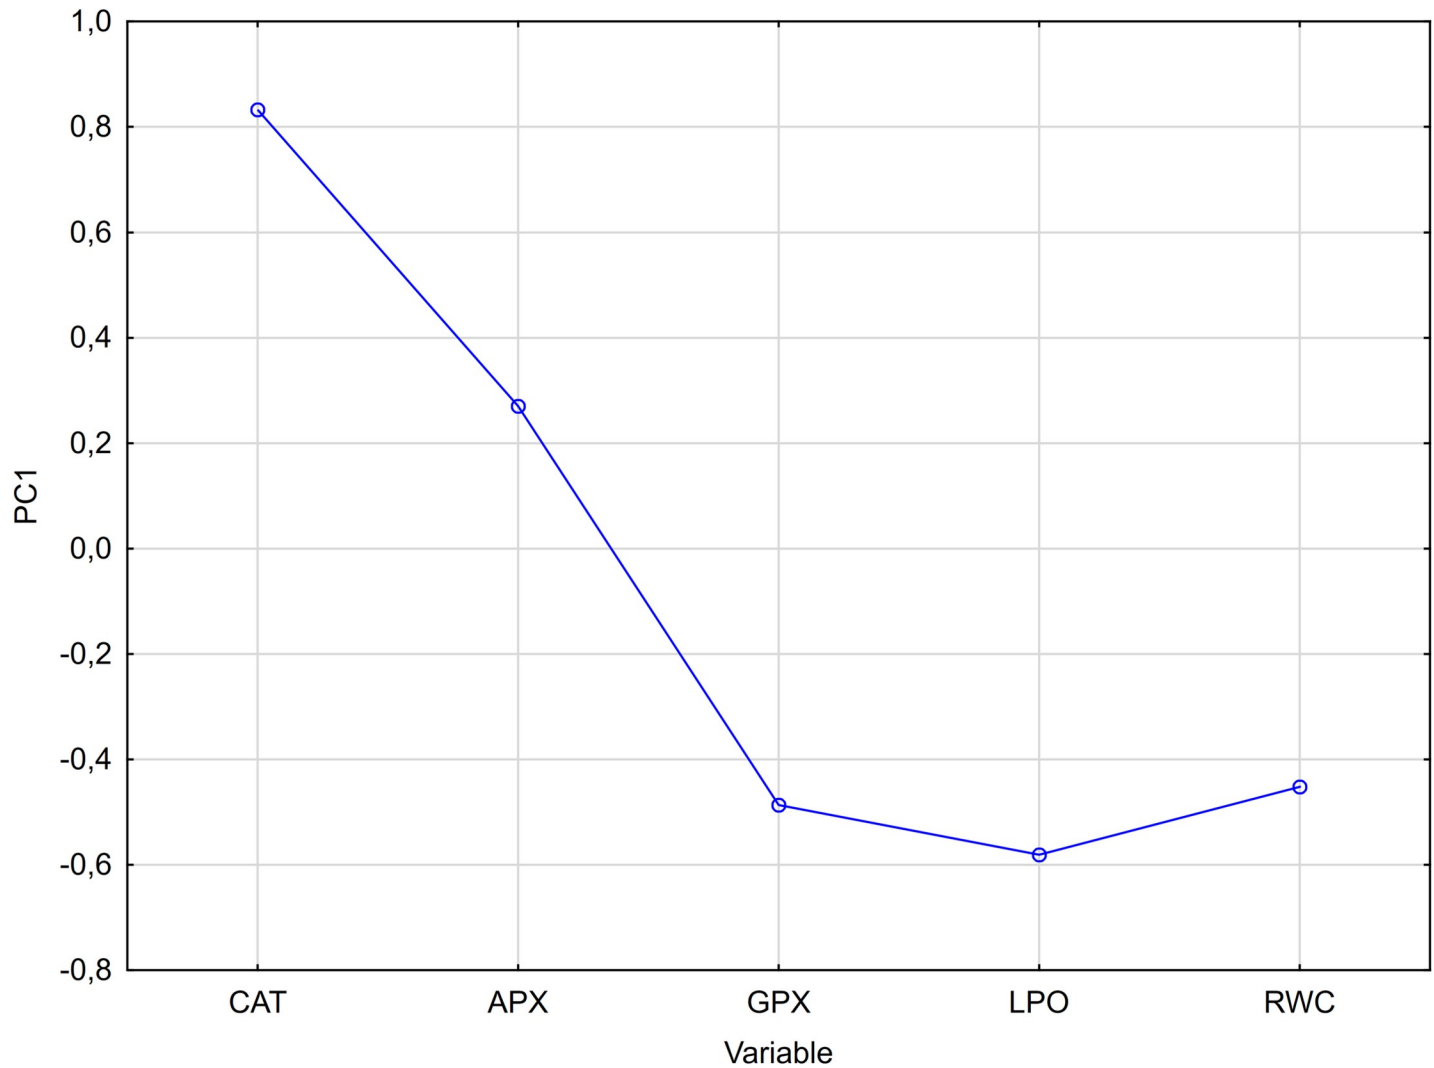

Fig 6. Loading lineplot for PC1.

<https://doi.org/10.1371/journal.pone.0221849.g006>

*aconitifolia* [19] and *Eremosparton songoricum* [44]. According to Chugh et al. [47], peroxidases are often the first enzymes, and their activity levels change under stress. Previous data obtained for maize [47,50] and wheat [49,58,59] suggests that longer periods of stress should increase GPX activity. Li et al. [44] suggested that the period revealing the highest activity in all antioxidant enzymes may constitute the key point of responses to drought stress during the seedling stage. According to Chakraborty and Pradhan [49], CAT and GPX enzyme activities are considered an important anti-drought mechanism in coping with oxidative stress during water deficit periods. Furthermore, Sharma and Dubey [60] suggested that an increase in peroxidase activity in stressed seedlings may be correlated with oxidation reactions associated with an increase of peroxide and free radical content in plant cells.

The results of our analysis reveal a significant correlation between CAT and APX but a negative one between CAT and GPX. A negative correlation between CAT and GPX has also been found for maize [50], wheat [59] and *Brassica* [57]. According to our results, declines in GPX activity observed suggest that CAT and APX perform central functions in the antioxidant mechanism. Furthermore, a positive correlation between CAT and APX was observed in

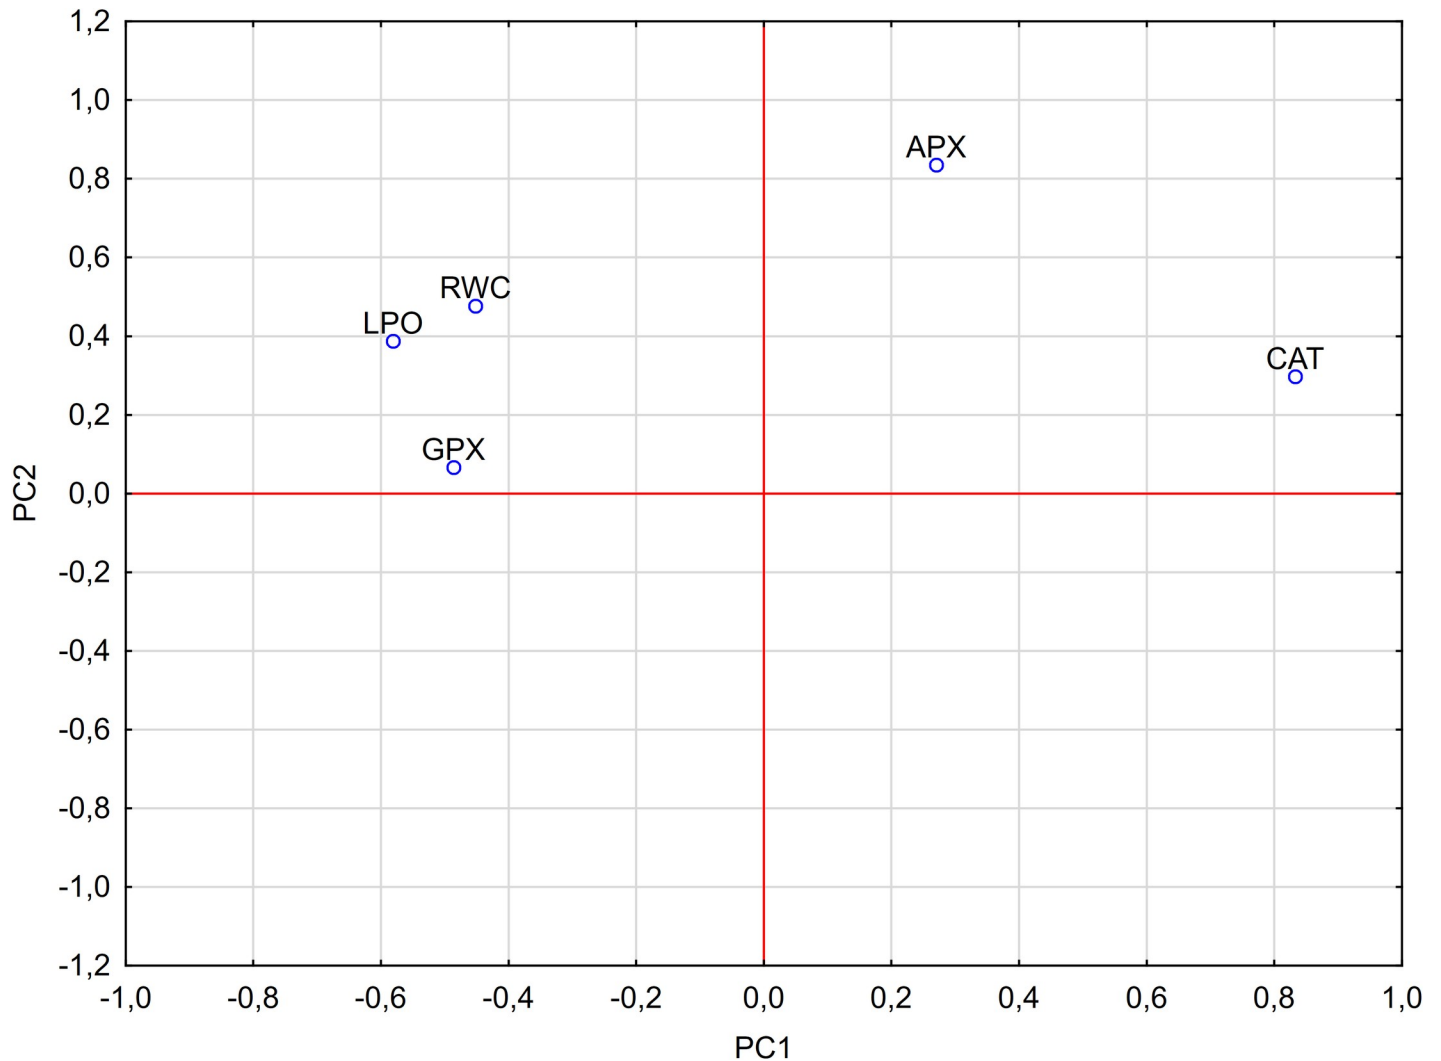

Fig 7. Loading scatterplot PC1 vs. PC2 for analyzed variables.

<https://doi.org/10.1371/journal.pone.0221849.g007>

wheat treated with PEG [59] and in *Kentucky bluegrass* [61]. The present study reveals a negative correlation between CAT and LPO consistent with previous reports on *Eremosparton son-goricum* [44] and *Kentucky bluegrass* [61].

In the current study, we did not observe any significant changes in RWC over 6 h of osmotic stress. Moreover, no significant differences in RWC were observed among the tested lines. From the obtained results and previous studies, we suggest that 6 h of 10% PEG treatment should not lead to physiological changes in plants attributed to alterations in RWC. Our results are in line with many reports on wheat [12,56] and other plant species such as *Cleome gynandra* [46] and *Phaseolus acutifolius* [54]. According to Bandurska et al. [10], RWC serves as a good indicator of a plant's ability to avoid dehydration by osmotic adjustment. Most studies have demonstrated that long-term periods of drought cause a decrease in RWC in wheat after 2 days [12], 3 days [49] and 5 days [14]. From previous reports, we suggest that in our experiments, significant changes in RWC could be observed after at least 48 h. Ozfidan et al. [62] proved that the period of stress has a significant impact on RWC. Moreover, plant developmental stage also affects RWC. Declines in RWC occurring during an earlier growth stage

are generally less pronounced than those occurring in later growth stages [63]. RWC is also shaped by the concentration of PEG. Variable responses to stress induced by different PEG levels have been observed in wheat [48] and maize [64]. Based on previous studies, the 10% PEG induces mild water-deficit conditions that do not affect RWC and that result in adaptation to drought through effective osmoregulation. The tested lines exhibited a capacity for osmoregulation, which enabled them to maintain a relatively high volume of turgor protoplasts and high levels of activity in the photosynthetic apparatus [48]. In our study, an insignificant increase in RWC values was observed for certain lines. An increase in RWC has also been observed in *Arabidopsis thaliana* [62] and tomato plants [65] under drought. These authors suggest that such an increase in RWC may be related to the accumulation of a larger volume of proline.

In the present study, we identified chromosomes associated with early wheat responses to short-term stress from a set of S29 substitution lines (JP) showing differing degrees of tolerance to water deficit. We found that the substitution of chromosomes 6B and 7D spurred the most significant changes in LPO to the recipient. It indicates that chromosomes 1A, 4A, 5A, 4B and 7D include genes involved in CAT activity. Genes involved in GPX activity are associated with chromosomes belonging to homologous groups 5 (5A, 5B, and 5D) and 4 (4B and 4D) and to chromosomes 6A, 2B and 7B.

## Conclusions

Our study reveals a complex system of plant responses to short-term water-deficit stress. The first reaction of the tested wheat lines included an increase in GPX activity. However, catalase had the strongest impact on plant responses, as it caused a significant decline in LPO levels. In the current study, we found that chromosomes 5A, 4B, 6B and 7D are associated with early wheat responses to short-term stress. The substitution of these chromosomes spurred the most significant changes in the activity of the tested enzymes and in lipid peroxidation relative to S29. Therefore, structural and regulatory genes involved in rapid plant reactions may be positioned on these chromosomes.

## Supporting information

**S1 Fig. Changes of lipid peroxidation expressed in terms of TBARS concentration in lines with substitution of A genome chromosomes (a-f) compared to S29 during 1, 3 and 6 h of 10% PEG treatment and in non-exposed plants. Bars represent 95% confidence intervals (CI). \* indicates significant differences compared to S29 at  $p < 0.05$  according to Dunnett's test. (TIF)**

**S2 Fig. Changes of lipid peroxidation expressed in terms of TBARS concentration in lines with substitution of B genome chromosomes (a-f) compared to S29 during 1, 3 and 6 h of 10% PEG treatment and in non-exposed plants. Bars represent confidence interval (CI). \* indicates significant differences compared to S29 at  $p < 0.05$  according to Dunnett's test. (TIF)**

**S3 Fig. Changes of lipid peroxidation expressed in terms of TBARS concentration in lines with substitution of D genome chromosomes (a-f) compared to S29 during 1, 3 and 6 h of 10% PEG treatment and in non-exposed plants. Bars represent confidence interval (CI). \* indicates significant differences compared to S29 at  $p < 0.05$  according to Dunnett's test. (TIF)**

**S4 Fig. Changes of a) lipid peroxidation expressed in terms of TBARS concentration b) CAT activity c) APX activity d) GPX activity in JP compared to S29 during 1, 3 and 6 h of**

**10% PEG treatment and in non-exposed plants.** Bars represent confidence interval (CI). \*indicates significant differences compared to S29 at  $p < 0.05$  according to Dunnett's test. (TIF)

**S5 Fig. Changes of CAT activity in lines with substitution of A genome chromosomes (a-f) compared to S29 during 1, 3 and 6 h of 10% PEG treatment and in non-exposed plants.** Bars represent 95% confidence intervals (CI). \*indicates significant differences compared to S29 at  $p < 0.05$  according to Dunnett's test. (TIF)

**S6 Fig. Changes of CAT activity in lines with substitution of B genome chromosomes (a-f) compared to S29 during 1, 3 and 6 h of 10% PEG treatment and in non-exposed plants.** Bars represent confidence interval (CI). \*indicates significant differences compared to S29 at  $p < 0.05$  according to Dunnett's test. (TIF)

**S7 Fig. Changes of CAT activity in lines with substitution of D genome chromosomes (a-f) compared to S29 during 1, 3 and 6 h of 10% PEG treatment and in non-exposed plants.** Bars represent confidence interval (CI). \*indicates significant differences compared to S29 at  $p < 0.05$  according to Dunnett's test. (TIF)

**S8 Fig. Changes of APX activity in lines with substitution of A genome chromosomes (a-f) compared to S29 during 1, 3 and 6 h of 10% PEG treatment and in non-exposed plants.** Bars represent 95% confidence intervals (CI). \*indicates significant differences compared to S29 at  $p < 0.05$  according to Dunnett's test. (TIF)

**S9 Fig. Changes of APX activity in lines with substitution of B genome chromosomes (a-f) compared to S29 during 1, 3 and 6 h of 10% PEG treatment and in non-exposed plants.** Bars represent confidence interval (CI). \*indicates significant differences compared to S29 at  $p < 0.05$  according to Dunnett's test. (TIF)

**S10 Fig. Changes of APX activity in lines with substitution of D genome chromosomes (a-f) compared to S29 during 1, 3 and 6 h of 10% PEG treatment and in non-exposed plants.** Bars represent confidence interval (CI). \*indicates significant differences compared to S29 at  $p < 0.05$  according to Dunnett's test. (TIF)

**S11 Fig. Changes of GPX activity in lines with substitution of A genome chromosomes (a-f) compared to S29 during 1, 3 and 6 h of 10% PEG treatment and in non-exposed plants.** Bars represent 95% confidence intervals (CI). \*indicates significant differences compared to S29 at  $p < 0.05$  according to Dunnett's test. (TIF)

**S12 Fig. Changes of GPX activity in lines with substitution of B genome chromosomes (a-f) compared to S29 during 1, 3 and 6 h of 10% PEG treatment and in non-exposed plants.** Bars represent confidence interval (CI). \*indicates significant differences compared to S29 at  $p < 0.05$  according to Dunnett's test. (TIF)

**S13 Fig. Changes of GPX activity in lines with substitution of D genome chromosomes (a-f) compared to S29 during 1, 3 and 6 h of 10% PEG treatment and in non-exposed plants.** Bars represent confidence interval (CI). \* indicates significant differences compared to S29 at  $p < 0.05$  according to Dunnett's test.  
(TIF)

**S1 Table. List of the intervarietal single chromosome substitution lines (ISCSLs) used in the study.**  
(PDF)

## Author Contributions

**Conceptualization:** Karolina Dudziak, Michał Nowak.

**Data curation:** Karolina Dudziak, Michał Nowak.

**Investigation:** Karolina Dudziak, Magdalena Zapalska.

**Methodology:** Karolina Dudziak, Piotr Bulak, Magdalena Zapalska, Justyna Leśniowska-Nowak, Michał Nowak.

**Resources:** Andreas Börner.

**Software:** Michał Nowak.

**Validation:** Karolina Dudziak, Michał Nowak.

**Writing – original draft:** Karolina Dudziak, Hubert Szczerba.

**Writing – review & editing:** Andreas Börner, Michał Nowak.

## References

1. Peña-Bautista RJ, Hernandez-Espinosa N, Jones JM, Guzmán C, Braun HJ. CIMMYT Series on carbohydrates, wheat, grains, and health: wheat-based foods: their global and regional importance in the food supply, nutrition, and health. *Cereal Foods World*. 2017; 62(5): 231–249.
2. Baloglu MC, Inal B, Kavas M, Unver T. Diverse expression pattern of wheat transcription factors against abiotic stresses in wheat species. *Gene*. 2014; 550(1): 117–122. <https://doi.org/10.1016/j.gene.2014.08.025> PMID: 25130909
3. Shiferaw B, Smale M, Braun HJ, Duveiller E, Reynolds M, Muricho G. Crops that feed the world 10. Past successes and future challenges to the role played by wheat in global food security. *Food Security*. 2013; 5(3): 291–317.
4. FAO (2017) FAOSTAT database collection. Food and Agriculture Organization of the United Nations. Rome. <http://faostat.fao.org>.
5. Lobell DB, Schlenker W, Costa-Roberts J. Climate trends and global crop production since 1980. *Science*. 2011; 333: 616–620. <https://doi.org/10.1126/science.1204531> PMID: 21551030
6. Zalibekov ZG. The arid regions of the world and their dynamics in conditions of modern climatic warming. *Arid Ecosystems*. 2011; 1: 1–7.
7. Hossain A, Sarker MAZ, Saifuzzaman M, Silva JA, Lozovskaya MV, Akhter MM. Evaluation of growth, yield, relative performance and heat susceptibility of eight wheat (*Triticum aestivum* L.) genotypes grown under heat stress. *International Journal of Plant Production*. 2013; 7: 615–636.
8. Maqsood M, Shehzad MA, Ahmad S, Mushtaq S. Performance of wheat (*Triticum aestivum* L.) genotypes associated with agronomical traits under water stress conditions. *Asian Journal of Pharmaceutical and Biological Research*. 2012; 2: 45–50.
9. Dodig D, Zoric M, Jovic M, Kandic V, Stanisavljevic R, Surlan-Momirovic G. Wheat seedlings growth response to water deficiency and how it correlates with adult plant tolerance to drought. *Journal of Agricultural Science*. 2015; 153(3): 466–480.



10. Bandurska H, Stroiński A, Zielezińska M. Effects of water deficit stress on membrane properties, lipid peroxidation and hydrogen peroxide metabolism in the leaves of barley genotypes. *Acta Societatis Botanicorum Poloniae*. 1997; 66(2): 177–183.
11. Lata C, Jha S, Dixit V, Sreenivasulu N, Prasad M. Differential antioxidative responses to dehydration-induced oxidative stress in core set of foxtail millet cultivars [*Setaria italica* (L.)]. *Protoplasma*. 2011; 248(4): 817–828. <https://doi.org/10.1007/s00709-010-0257-y> PMID: 21197597
12. Sultan MARF, Hui L, Yang LJ, Xian ZH. Assessment of drought tolerance of some *Triticum* L. species through physiological indices. *Czech Journal of Genetics and Plant Breeding*. 2012; 48(4): 178–184.
13. Sheoran S, Thakur V, Narwal S, Turan R, Mamrutha HM, Singh V, et al. Differential activity and expression profile of antioxidant enzymes and physiological changes in wheat (*Triticum aestivum* L.) under drought. *Applied Biochemistry and Biotechnology*. 2015; 177(6): 1282–1298. <https://doi.org/10.1007/s12010-015-1813-x> PMID: 26319568
14. Weng M, Cui L, Liu F, Zhang M, Shan L. Effects of Drought Stress on Antioxidant Enzymes in Seedlings of Different Wheat Genotypes. *Pakistan Journal of Botany*. 2015; 47(1): 49–56.
15. Manavalan LP, Nguyen HT. Drought tolerance in crops: physiology to genomics. *Plant Stress Physiology*. 2nd Edition. 2017: 1–23.
16. Naderi R, Valizadeh M, Toorchi M, Shakiba MR. Antioxidant enzyme changes in response to osmotic stress in wheat (*Triticum aestivum* L.) seedling. *Acta Biologica Szegediensis*. 2014; 58(2): 95–101.
17. Harb A, Awad D, Samarah N. Gene expression and activity of antioxidant enzymes in barley (*Hordeum vulgare* L.) under controlled severe drought. *Journal of Plant Interactions*. 2015; 10(1): 109–116.
18. Sofo A, Scopa A, Nuzzaci M, Vitti A. Ascorbate peroxidase and catalase activities and their genetic regulation in plants subjected to drought and salinity stresses. *International Journal of Molecular Sciences*. 2015; 16(6): 13561–13578. <https://doi.org/10.3390/ijms160613561> PMID: 26075872
19. Harsh A, Sharma YK, Joshi U, Rampuria S, Singh G, Kumar S, et al. Effect of short-term heat stress on total sugars, proline and some antioxidant enzymes in moth bean (*Vigna aconitifolia*). *Annals of Agricultural Sciences*. 2016; 61(1): 57–64.
20. Varga B, Janda T, László E, Veisz O. Influence of abiotic stresses on the antioxidant enzyme activity of cereals. *Acta Physiologiae Plantarum*. 2012; 34(3): 849–858.
21. Kader DZA, Saleh AAH, Elmeleigy SA, Dosoky NS. Chilling-induced oxidative stress and polyamines regulatory role in two wheat varieties. *Journal of Taibah University for Science*. 2011; 5: 14–24.
22. Li X, Yang Y, Jia L, Chen H, Wei X. Zinc-induced oxidative damage, antioxidant enzyme response and proline metabolism in roots and leaves of wheat plants. *Ecotoxicology and Environmental Safety*. 2013b; 89: 150–157.
23. Nikolaeva MK, Maevskaya SN, Shugaev AG, Bukhov NG. Effect of drought on chlorophyll content and antioxidant enzyme activities in leaves of three wheat cultivars varying in productivity. *Russian Journal of Plant Physiology*. 2010; 57(1): 87–95.
24. Fleury D, Jefferies S, Kuchel H, Langridge P. Genetic and genomic tools to improve drought tolerance in wheat. *Journal of Experimental Botany*. 2010; 61(12): 3211–3222. <https://doi.org/10.1093/jxb/erq152> PMID: 20525798
25. Osipova SV, Permyakov AV, Permyakova MD, Pshenichnikova TA, Börner A. Leaf dehydroascorbate reductase and catalase activity is associated with soil drought tolerance in bread wheat. *Acta Physiologiae Plantarum*. 2011; 33(6): 2169–2177.
26. Osipova SV, Permyakov AV, Permyakova MD, Pshenichnikova TA, Genaev MA, Börner A. The antioxidant enzymes activity in leaves of inter-varietal substitution lines of wheat (*Triticum aestivum* L.) with different tolerance to soil water deficit. *Acta Physiologiae Plantarum*. 2013; 35(8): 2455–2465.
27. Mwadingeni L, Shimelis H, Dube E, Laing MD, Tsilo TJ. Breeding wheat for drought tolerance: Progress and technologies. *Journal of Integrative Agriculture*. 2016; 15(5): 935–943.
28. Kirigwi FM, Van Ginkel M, Brown-Guedira G, Gill BS, Paulsen GM, Fritz AK. Markers associated with a QTL for grain yield in wheat under drought. *Molecular Breeding*. 2007; 20: 401–413.
29. Salem KFM, Roder MS, Börner A. Identification and mapping quantitative trait loci for stem reserve mobilisation in wheat (*Triticum aestivum* L.). *Cereal Research Communications*. 2007; 35: 1367–1374.
30. Mathews KL, Malosetti M, Chapman S, McIntyre L, Reynolds M, Shorter R, et al. Multi-environment QTL mixed models for drought stress adaptation in wheat. *Theoretical and Applied Genetics*. 2008; 117: 1077–1091. <https://doi.org/10.1007/s00122-008-0846-8> PMID: 18696042
31. Quarri SA, Guilli M, Calestani C, Steed A, Marmiroli N. Location of a gene regulating drought-induced abscisic acid production in the long arm of chromosome 5A of wheat. *Theoretical and Applied Genetics*. 1994; 89: 794–800. <https://doi.org/10.1007/BF00223721> PMID: 24178027

32. Lagudah SS, Apples R, Brown AHD. The molecular-genetic analysis of *Triticum tauschii*, the D-genome donor to hexaploid wheat. *Genome*. 1991; 34: 375–386.
33. Dubcovsky J, Luo MC, Dvorak JM. Linkage relationships among stress induced genes in wheat. *Theoretical and Applied Genetics*. 1995; 90: 795–801.
34. Ahmad MQ, Khan SH, Khan AS, Kazi AM, Basra S. Identification of QTLs for drought tolerance traits on wheat chromosome 2A using association mapping. *International Journal of Agriculture and Biology*. 2014; 16: 862–870.
35. Balakhnina T, Bulak P, Matichenkov VV, Kosobryukhov AA, Włodarczyk TM. The influence of Si-rich mineral zeolite on the growth processes and adaptive potential of barley plants under cadmium stress. *Plant Growth Regulations*. 2015; 75: 557–565.
36. Bradford MM. A rapid and sensitive method for the quantitation of microgram quantities of protein utilizing the principle of protein dye binding. *Analytical Biochemistry*. 1976; 72: 248–254. <https://doi.org/10.1006/abio.1976.9999> PMID: 942051
37. Uchiyama M, Mihara M. Determination of malonaldehyde precursor in tissues by thiobarbituric acid test. *Analytical Biochemistry*. 1978; 86: 287–297. [https://doi.org/10.1016/0003-2697\(78\)90344-5](https://doi.org/10.1016/0003-2697(78)90344-5)
38. Aebi H. Catalase *in vitro*. *Methods in Enzymology*. 1984; 105: 121–126. [https://doi.org/10.1016/s0076-6879\(84\)05016-3](https://doi.org/10.1016/s0076-6879(84)05016-3) PMID: 6727660
39. Nakano Y, Asada K. Hydrogen peroxide is scavenged by ascorbate-specific peroxidase in spinach chloroplasts. *Plant and Cell Physiology*. 1981; 22: 867–880.
40. Rampino P, Pataleo S, Gerardi C, Mita G, Perrotta C. Drought stress response in wheat: physiological and molecular analysis of resistant and sensitive genotypes. *Plant, Cell and Environment*. 2006; 29: 2143–2152. <https://doi.org/10.1111/j.1365-3040.2006.01588.x> PMID: 17081248
41. Li Z, Zhang Y, Peng D, Wang X, Peng Y, He X, et al. Polyamine regulates tolerance to water stress in leaves of white clover associated with antioxidant defense and dehydrin genes via involvement in calcium messenger system and hydrogen peroxide signaling. *Frontiers in Physiology*. 2015; 6: 1–16. <https://doi.org/10.3389/fphys.2015.00001>
42. Barrs HD, Weatherley PE. A re-examination of the relative turgidity technique for estimating water deficit in leaves. *Australian Journal of Biological Sciences*. 1962; 15: 413–428.
43. Gill SS, Tuteja N. Reactive oxygen species and antioxidant machinery in abiotic stress tolerance in crop plants. *Plant Physiology and Biochemistry*. 2010; 48(12): 909–930. <https://doi.org/10.1016/j.plaphy.2010.08.016> PMID: 20870416
44. Li H, Li X, Zhang D, Liu H, Guan K. Effects of drought stress on the seed germination and early seedling growth of the endemic desert plant *Eremosparton songoricum* (*Fabaceae*), *EXCLI Journal*. 2013a; 89–101.
45. Hernández JA, Almansa MS. Short-term effects of salt stress on antioxidant systems and leaf water relations of pea leaves, *Physiol Plantarum*. 2002; 115: 251–257.
46. Uzilday B, Turkan I, Sekmen AH, Ozgur R, Karakaya HC. Comparison of ROS formation and antioxidant enzymes in *Cleome gynandra* (C4) and *Cleome spinosa* (C3) under drought stress. *Plant Science*. 2012; 182: 59–70. <https://doi.org/10.1016/j.plantsci.2011.03.015> PMID: 22118616
47. Chugh V, Kaur N, Gupta AK. Evaluation of oxidative stress tolerance in maize (*Zea mays* L.) seedlings in response to drought. *Indian Journal of Biochemistry and Biophysics*. 2011; 48: 47–53. PMID: 21469602
48. Marcińska I, Czyczyło-Mysza I, Skrzypek E, Filek M, Grzesiak S, Grzesiak MT, et al. Impact of osmotic stress on physiological and biochemical characteristics in drought-susceptible and drought-resistant wheat genotypes. *Acta Physiologiae Plantarum*. 2013; 35(2): 451–461.
49. Chakraborty U, Pradhan B. Oxidative stress in five wheat varieties (*Triticum aestivum* L.) exposed to water stress and study of their antioxidant enzyme defense system, water stress responsive metabolites and H<sub>2</sub>O<sub>2</sub> accumulation. *Brazilian Journal of Plant Physiology*. 2012; 24(2): 117–130.
50. Kolarovič L, Valentovič P, Luxová M, Gašparíková O. Changes in antioxidants and cell damage in heterotrophic maize seedlings differing in drought sensitivity after exposure to short-term osmotic stress. *Plant Growth Regulation*. 2009; 59(1): 21–26.
51. Zarei S, Ehsanpour AA, Abbaspour J. The role of over-expression of P5CS gene on proline, catalase, ascorbate peroxidase activity and lipid peroxidation of transgenic tobacco (*Nicotiana tabacum* L.) plant under *in vitro* drought stress. *Journal of Cell and Molecular Research*. 2012; 4: 43–49.
52. Jiang Y, Watkins E, Liu S, Yu X, Luo N. Antioxidative responses and candidate gene expression in Prairie Junegrass under drought stress. *Journal of the American Society for Horticultural Science*. 2010; 135(4): 303–309.
53. Zhang Z, Zhang Q, Wu J, Zheng X, Zheng S, Sun X, Qiu Q, Lu T. Gene knockout study reveals that cytosolic ascorbate peroxidase 2 (OsAPX2) plays a critical role in growth and reproduction in rice under

- drought, salt and cold stresses. PLoS ONE. 2013; 8: e57472. <https://doi.org/10.1371/journal.pone.0057472> PMID: 23468992
54. Türkan I, Bor M, Özdemir F, Koca H. Differential responses of lipid peroxidation and antioxidants in the leaves of drought-tolerant *P. acutifolius* Gray and drought-sensitive *P. vulgaris* L. subjected to polyethylene glycol mediated water stress. *Plant Science*. 2005; 168: 223–231.
  55. Mittler R, Zilinskas BA. Regulation of pea cytosolic ascorbate peroxidase and other antioxidant enzymes during the progression of drought stress and following recovery from drought. *The Plant Journal*. 1994; 5: 397–405. PMID: 8180623
  56. Csiszár J, Gallé Á, Horváth E, Dancsó P, Gombos M, Váry Z, Erdei L, et al. Different peroxidase activities and expression of abiotic stress-related peroxidases in apical root segments of wheat genotypes with different drought stress tolerance under osmotic stress. *Plant Physiology and Biochemistry*. 2011; 52: 119–129. <https://doi.org/10.1016/j.plaphy.2011.12.006> PMID: 22305075
  57. Kaur P, Navita G, Sangha MK. Induction of thermotolerance through heat acclimation and salicylic acid in *Brassica* species. *African Journal of Biotechnology*. 2009; 8: 619–625.
  58. Zhang J, Kirkham MB. Drought stress-induced changes in activities of superoxide dismutase, catalase and peroxidase in wheat species. *Plant and Cell Physiology*. 1994; 35: 785–791.
  59. Mickky BM, Aldesuquy HS. Impact of osmotic stress on seedling growth observations, membrane characteristics and antioxidant defense system of different wheat genotypes. *Egyptian Journal of Basic and Applied Sciences*. 2017; 4(1): 47–54.
  60. Sharma P, Dubey RS. Drought induces oxidative stress and enhances the activities of antioxidant enzymes in growing rice seedlings. *Plant Growth Regulation*. 2005; 46: 209–221.
  61. Xu L, Han L, Huang B. Antioxidant enzyme activities and gene expression patterns in leaves of Kentucky bluegrass in response to drought and post-drought recovery. *Journal of the American Society for Horticultural Science*. 2011; 136: 247–255.
  62. Ozfidan C, Turkan I, Sekmen AH, Seckin B. Time course analysis of ABA and non-ionic osmotic stress-induced changes in water status, chlorophyll fluorescence and osmotic adjustment in *Arabidopsis thaliana* wild-type (Columbia) and ABA-deficient mutant (*aba2*). *Environmental and Experimental Botany*. 2013; 86: 44–45.
  63. Strauss JA, Agenbag GA. The use of physiological parameters to identify drought tolerance in spring wheat cultivars. *South African Journal of Plant and Soil*. 2000; 17(1): 20–29.
  64. Mohammadkhani N, Heidari R. Effects of drought stress on protective enzyme activities and lipid peroxidation in two maize cultivars. *Pakistan Journal of Biological Sciences*. 2007; 10(21): 3835–3840. PMID: 19090238
  65. Claussen W. Proline as a measure of stress in tomato plants. *Plant Science*. 2005; 168(1): 241–248.
